# Supplementary material for: Complex fitness landscape shapes variation in a hyperpolymorphic species
Source: eLife journal article supplement (doi:10.7554/elife.76073), 2022-05-09
Supplement: supp [file elife-76073-supp-v1.zip]

Archive with 17 entries (17 files):
- elife_poa_e76073_Figure_1_figure_supplement_1.pdf
- elife_poa_e76073_Figure_1_figure_supplement_2.pdf
- elife_poa_e76073_Figure_1_figure_supplement_3.pdf
- elife_poa_e76073_Figure_1_figure_supplement_4.pdf
- elife_poa_e76073_Figure_1_figure_supplement_5.pdf
- elife_poa_e76073_Figure_1_figure_supplement_6.pdf
- elife_poa_e76073_Figure_2_figure_supplement_1.pdf
- elife_poa_e76073_Figure_2_figure_supplement_2.pdf
- elife_poa_e76073_Figure_3_figure_supplement_1.pdf
- elife_poa_e76073_Figure_3_figure_supplement_2.pdf
- elife_poa_e76073_Figure_3_figure_supplement_3.pdf
- elife_poa_e76073_Figure_3_figure_supplement_4.pdf
- elife_poa_e76073_Figure_3_figure_supplement_5.pdf
- elife_poa_e76073_Figure_3_figure_supplement_6.pdf
- elife_poa_e76073_Figure_3_figure_supplement_7.pdf
- elife_poa_e76073_Figure_4_figure_supplement_1.pdf
- elife_poa_e76073_Figure_4_figure_supplement_2.pdf
