# Supplementary material for: Complex fitness landscape shapes variation in a hyperpolymorphic species
Source: eLife journal article supplement (doi:10.7554/elife.76073), 2022-05-09

**A** *S. commune* (USA) - all MAFs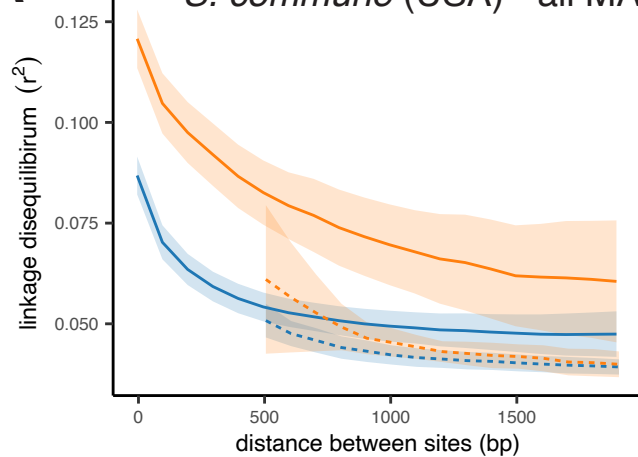**B** *S. commune* (RUS) - all MAFs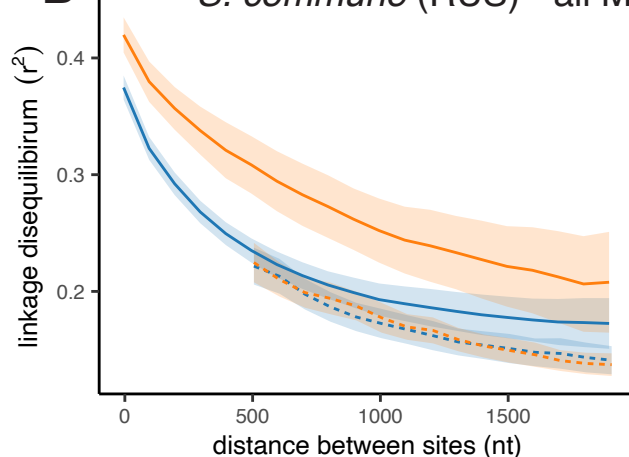**C** *S. commune* (USA)MAF  $\leq 5\%$  $5\% < \text{MAF} \leq 10\%$  $10\% < \text{MAF} \leq 20\%$ MAF  $> 20\%$ 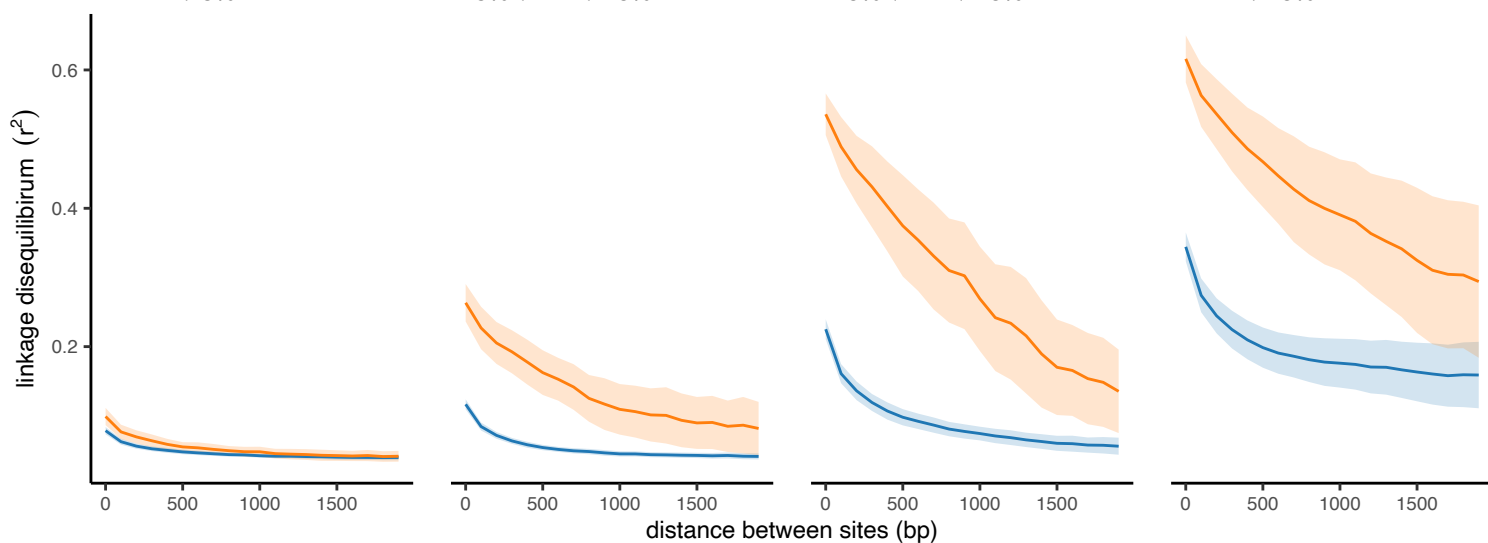**D** *S. commune* (RUS)MAF  $\leq 5\%$  $5\% < \text{MAF} \leq 10\%$  $10\% < \text{MAF} \leq 20\%$ MAF  $> 20\%$ 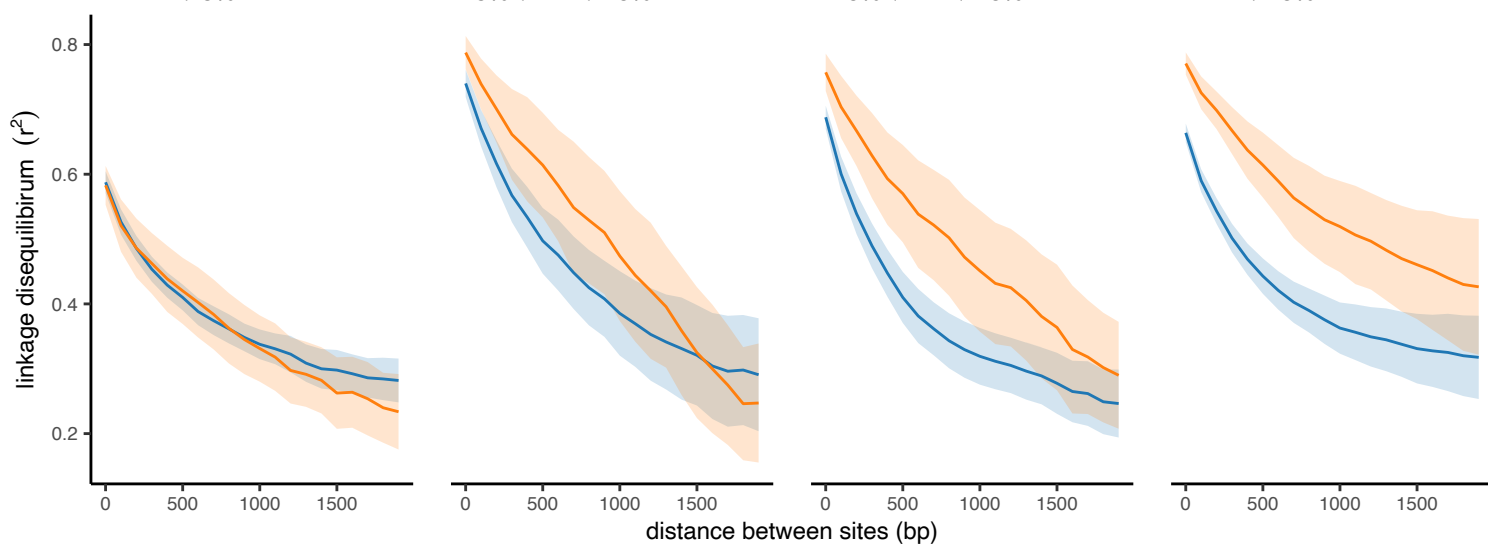

Supplement: supp [file elife-76073-supp-v1.zip › elife_poa_e76073_Figure_1_figure_supplement_4.pdf]
