# Supplementary material for: Complex fitness landscape shapes variation in a hyperpolymorphic species
Source: eLife journal article supplement (doi:10.7554/elife.76073), 2022-05-09

ACCCTCACCCCTTTCCCTTCAGCCATCTTCCCACATCCTTCGGAAGCTGCGCGTCCTCCGCGTGCCTTCGACTGCCCAACACAGTCAGAGGGCGACGTTTTCGA

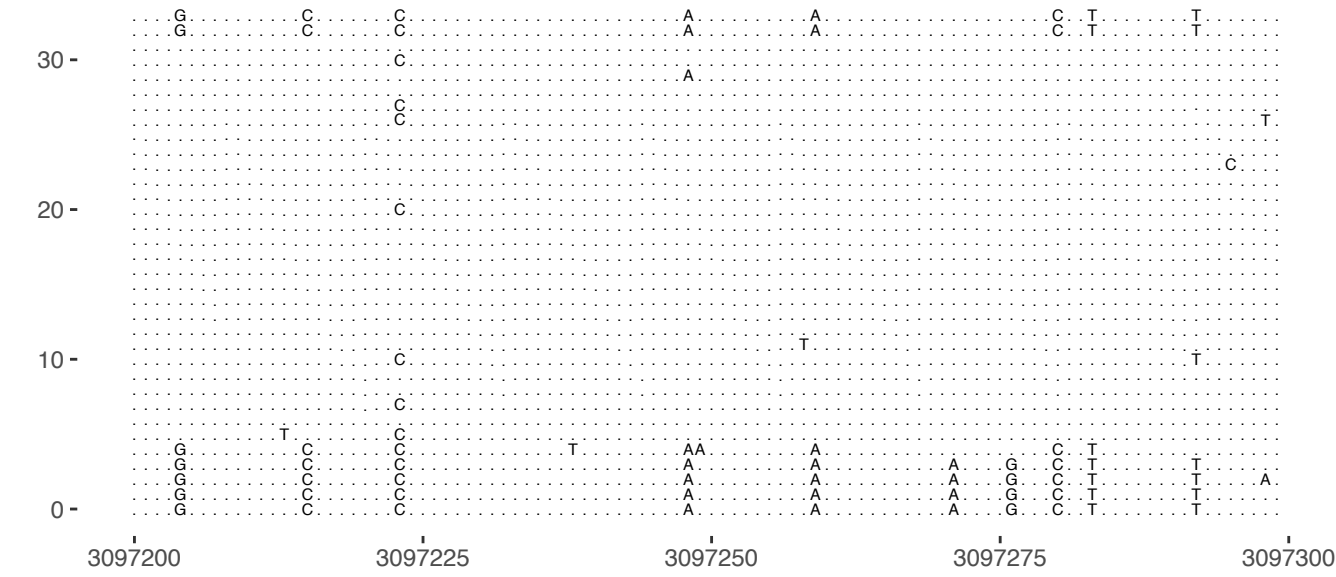

TCTTGTCCTCCACGCCGCCGACAGCTGCCCTCGAGGTGTCGCATCGCGGAGGAAGATAGATGGACAGTGCGAATTTGCGGAGCGCGTACGGCGACGAAGTT

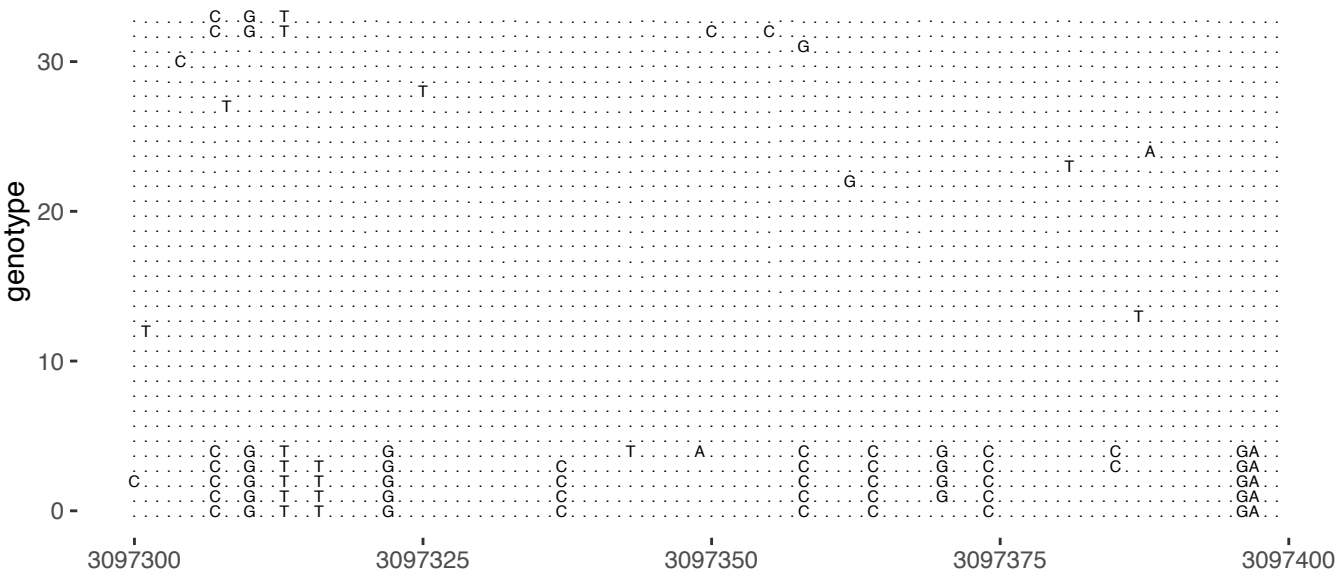

GCAGAGCCAGGCGACATCGGAGGCTTTCAGAGTGTTGAGAGAGACGTTTGCAGTTCGGGGAACAGCTGGTCCTCCCGTGGTGTGCGCCATGCCTATACGG

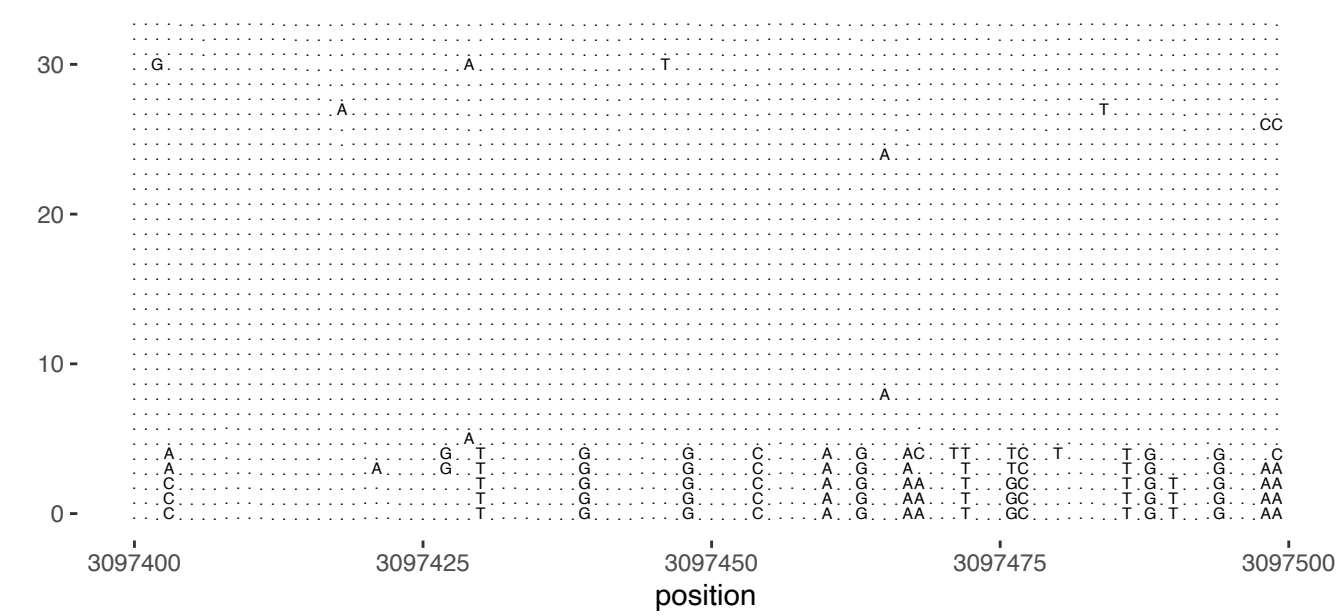

Supplement: supp [file elife-76073-supp-v1.zip › elife_poa_e76073_Figure_3_figure_supplement_3.pdf]
