# Supplementary figures and images for: Complex fitness landscape shapes variation in a hyperpolymorphic species
Source: eLife journal article supplement (doi:10.7554/elife.76073), 2022-05-09

**A**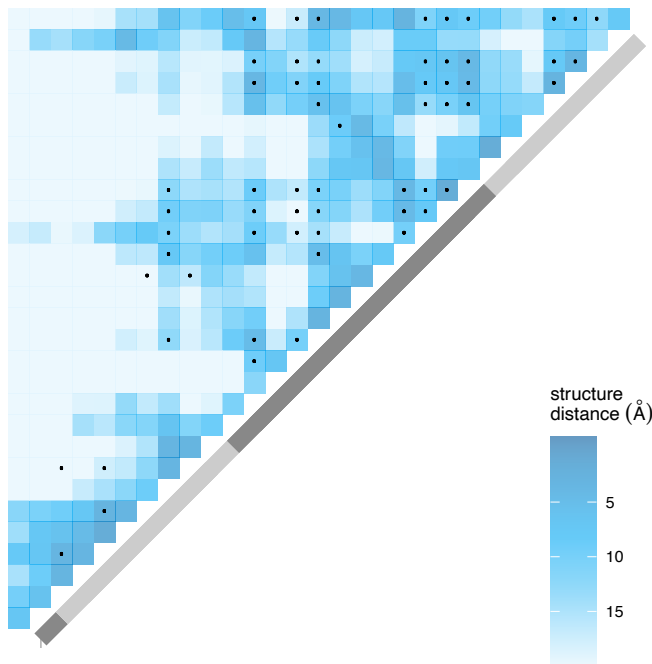**B**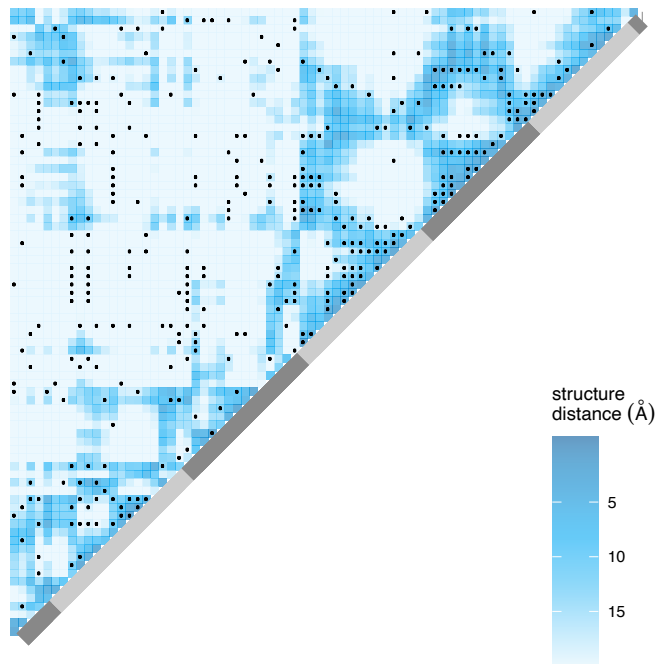**C**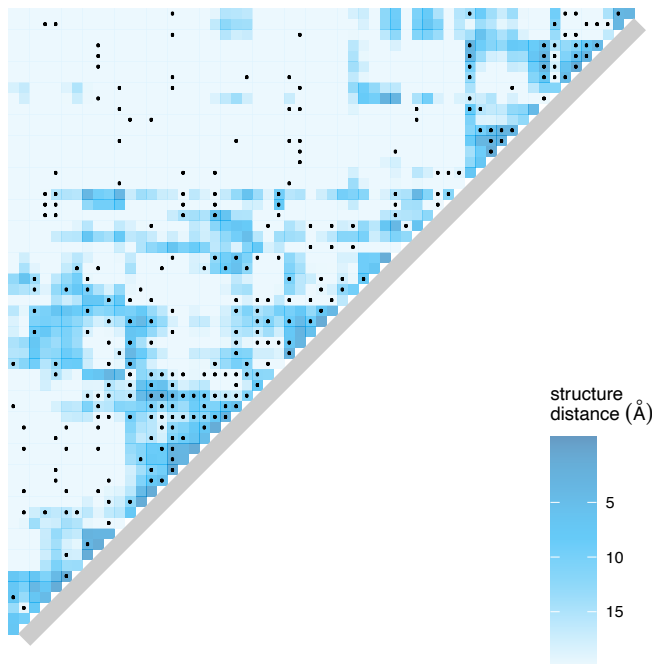**D**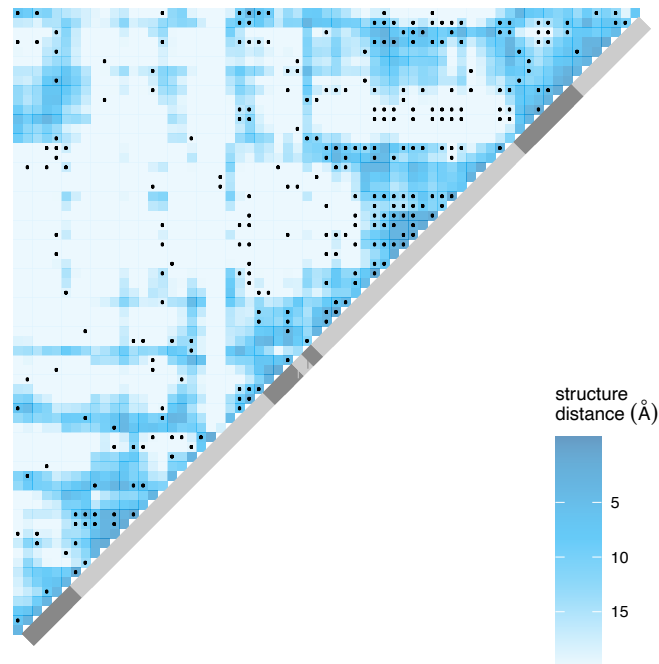

Supplement: supp [file elife-76073-supp-v1.zip]

**A**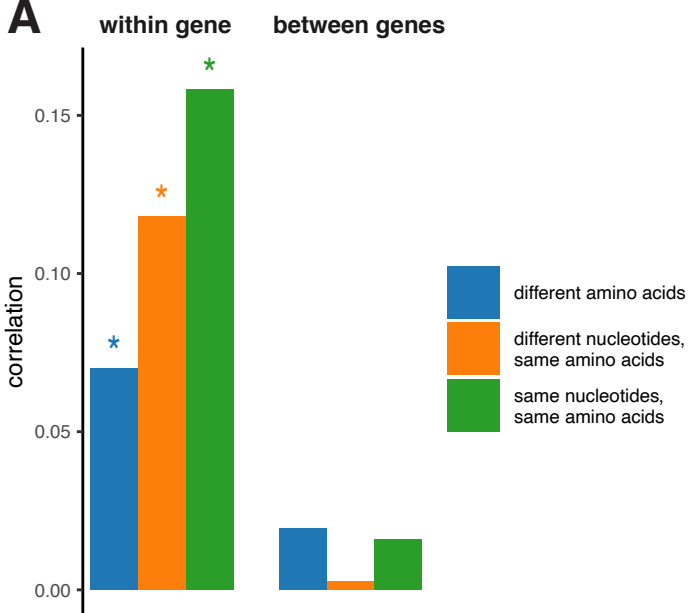**B**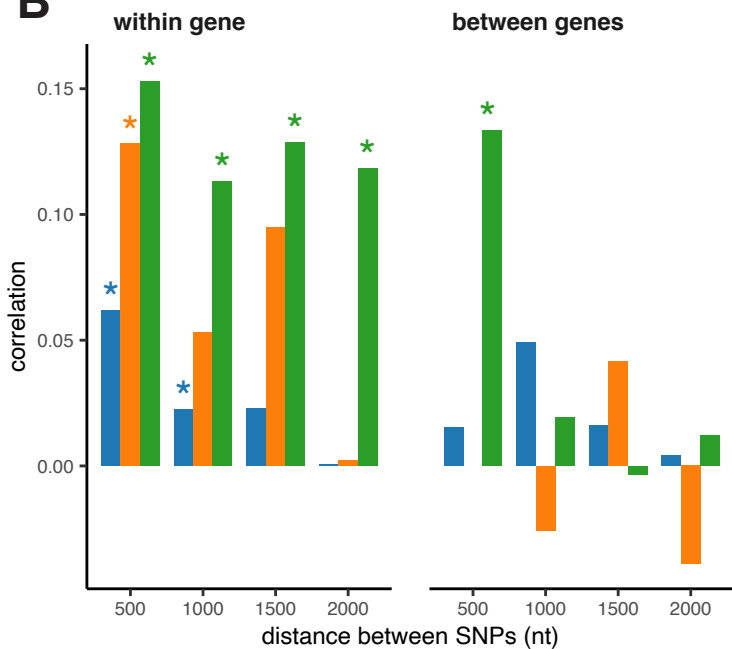

Supplement: supp [file elife-76073-supp-v1.zip]

**A** *H. sapiens*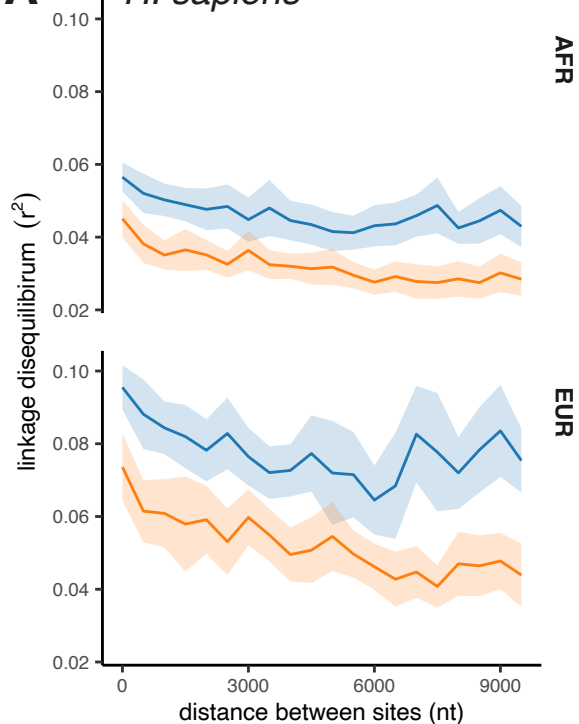**B**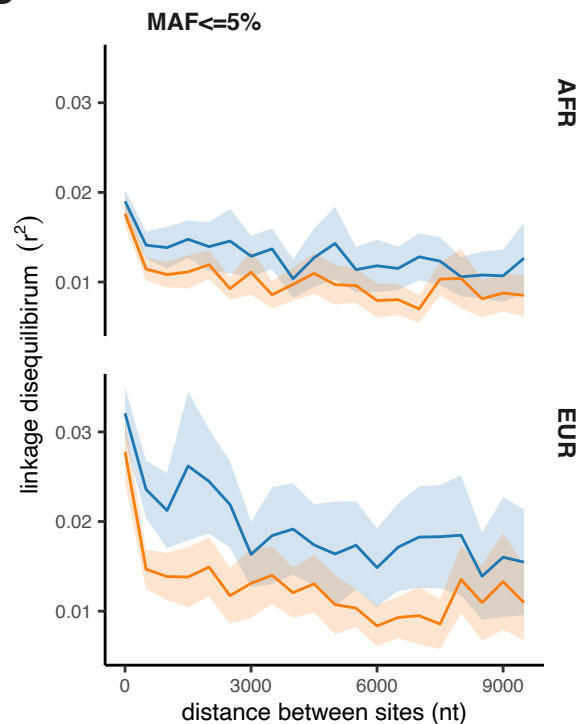**C**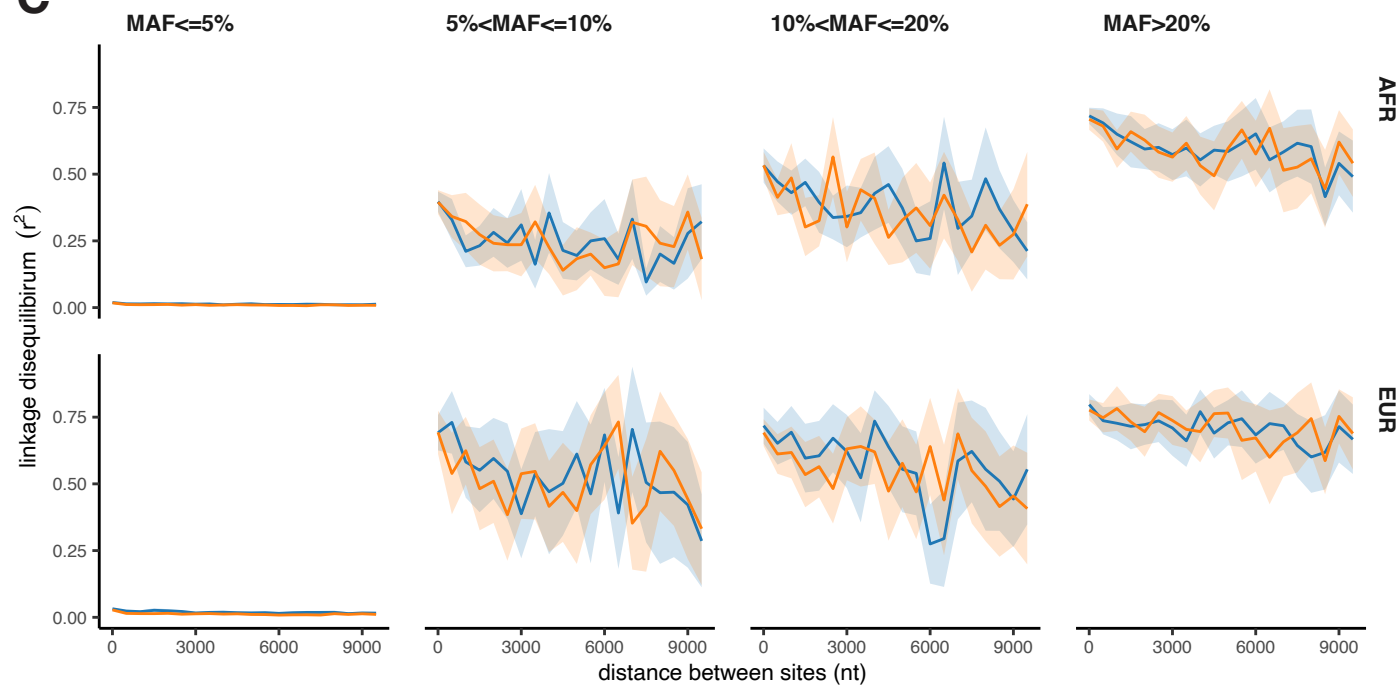

Supplement: supp [file elife-76073-supp-v1.zip]

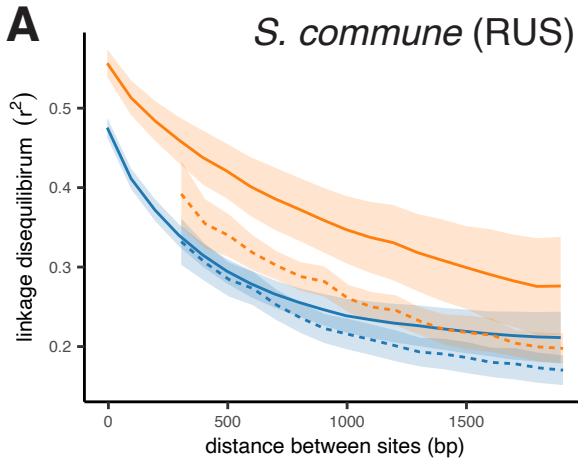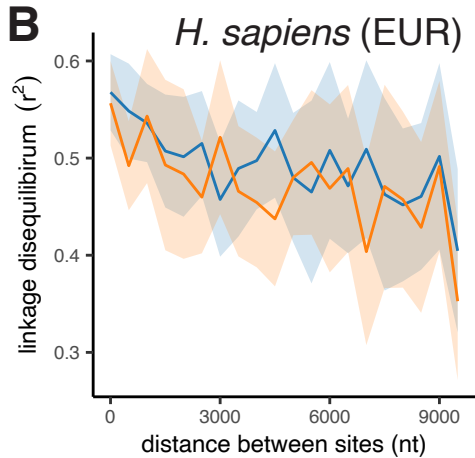

Supplement: supp [file elife-76073-supp-v1.zip]

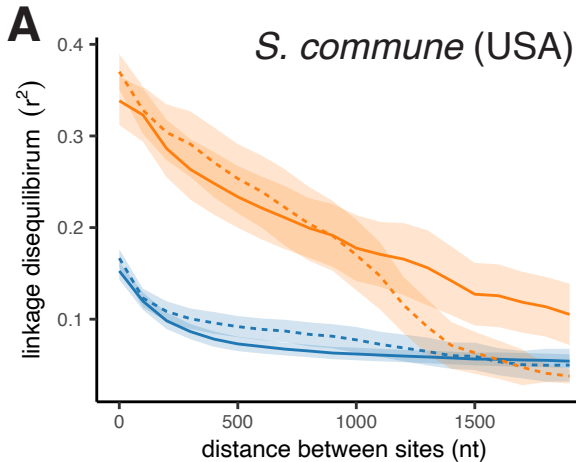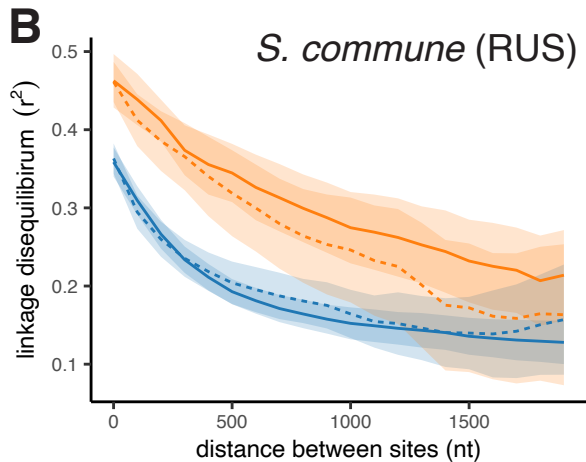

Supplement: supp [file elife-76073-supp-v1.zip]

**A***S. commune* (USA), all SNPs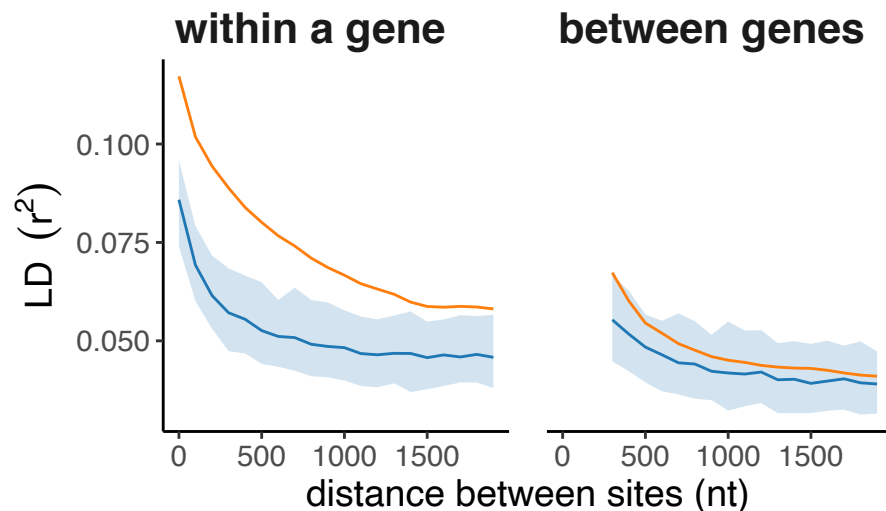*S. commune* (RUS), all SNPs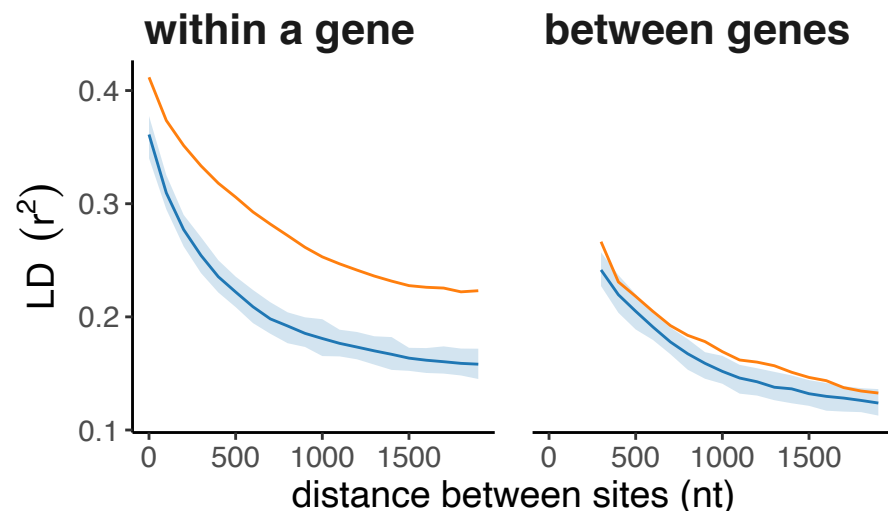**B***S. commune* (USA), MAF > 5%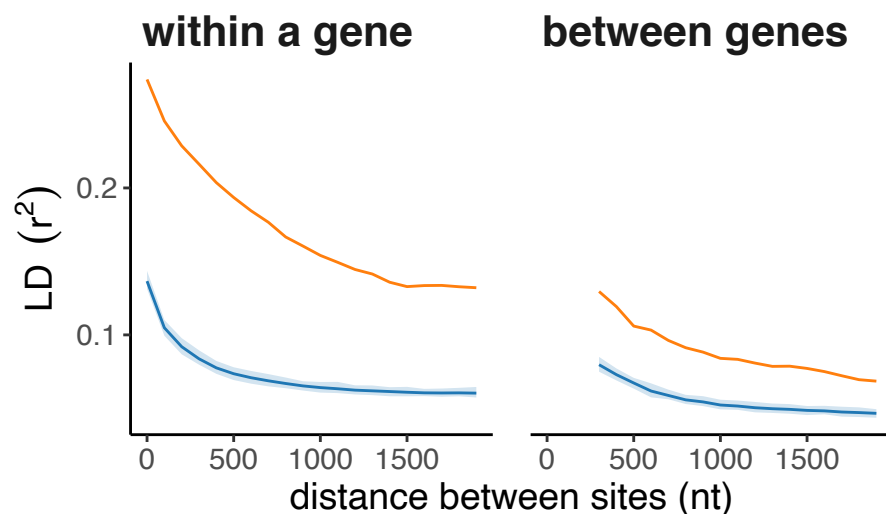*S. commune* (RUS), MAF > 5%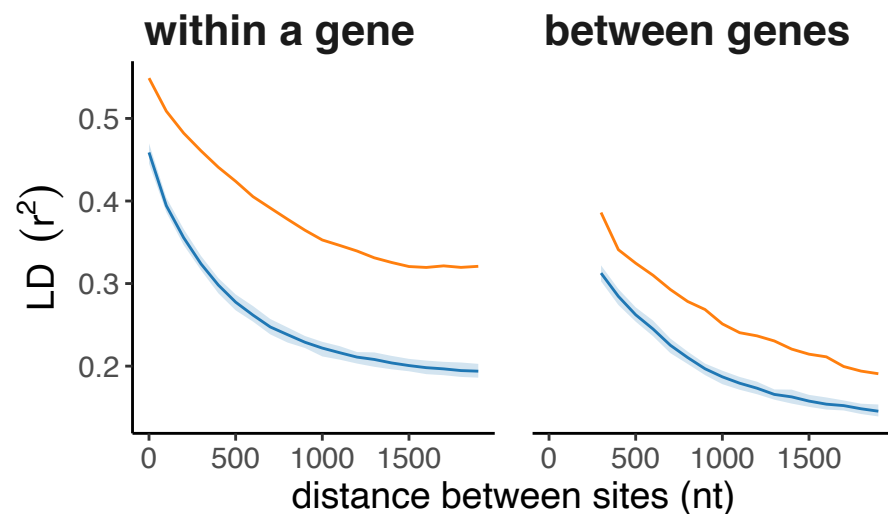

Supplement: supp [file elife-76073-supp-v1.zip]

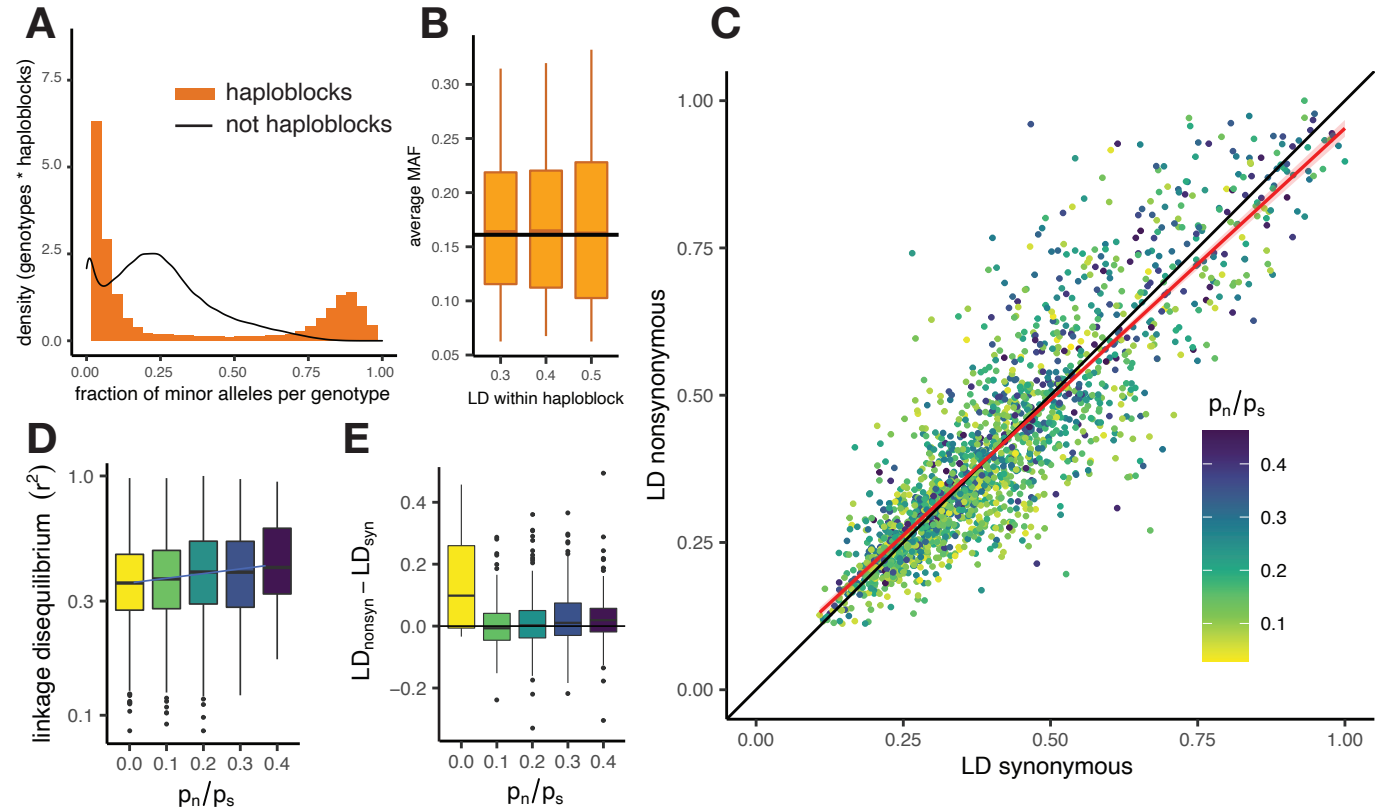

Supplement: supp [file elife-76073-supp-v1.zip]

# USA

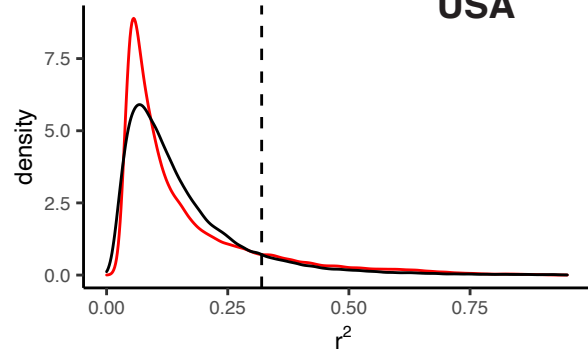

# RUS

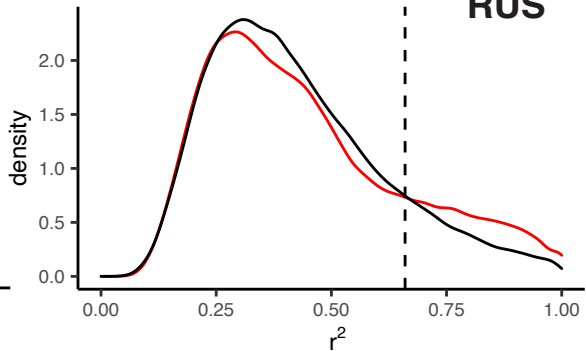

Supplement: supp [file elife-76073-supp-v1.zip]

USA

scaffold4:3097116-3098822

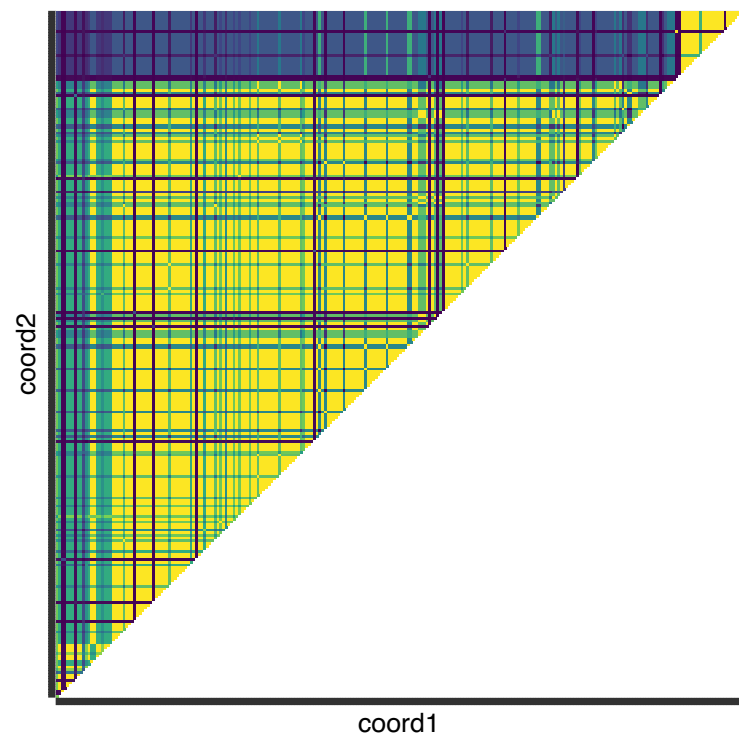

RUS

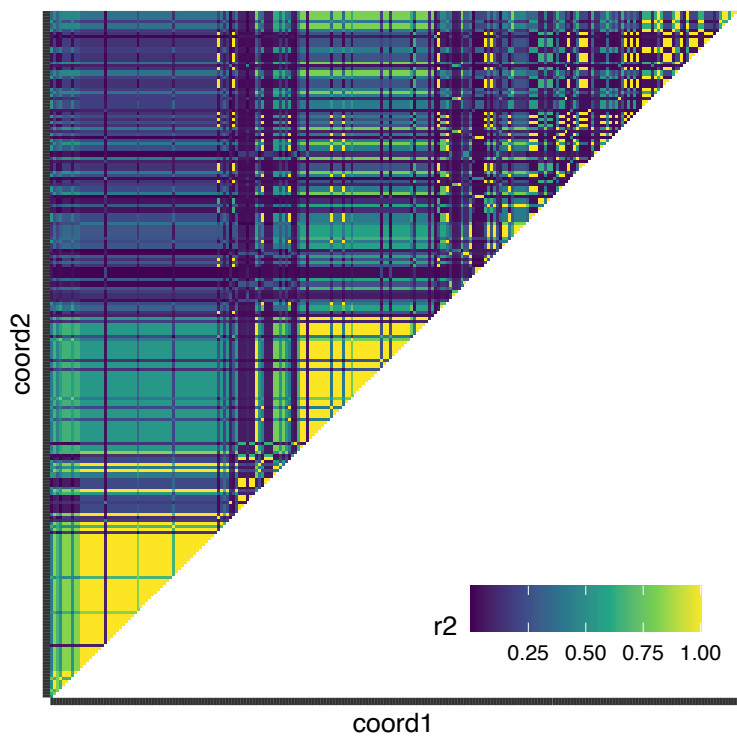

scaffold2:2017262-2019256

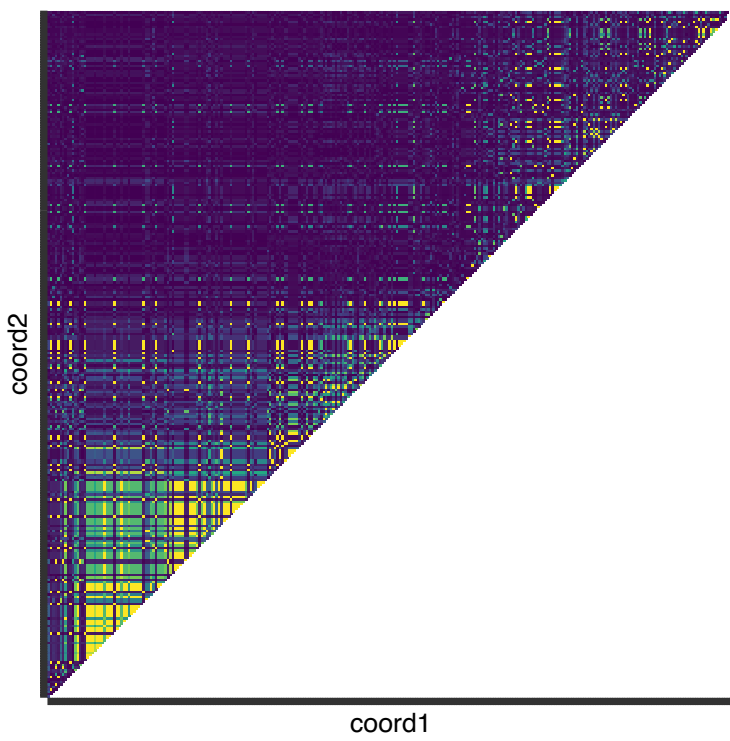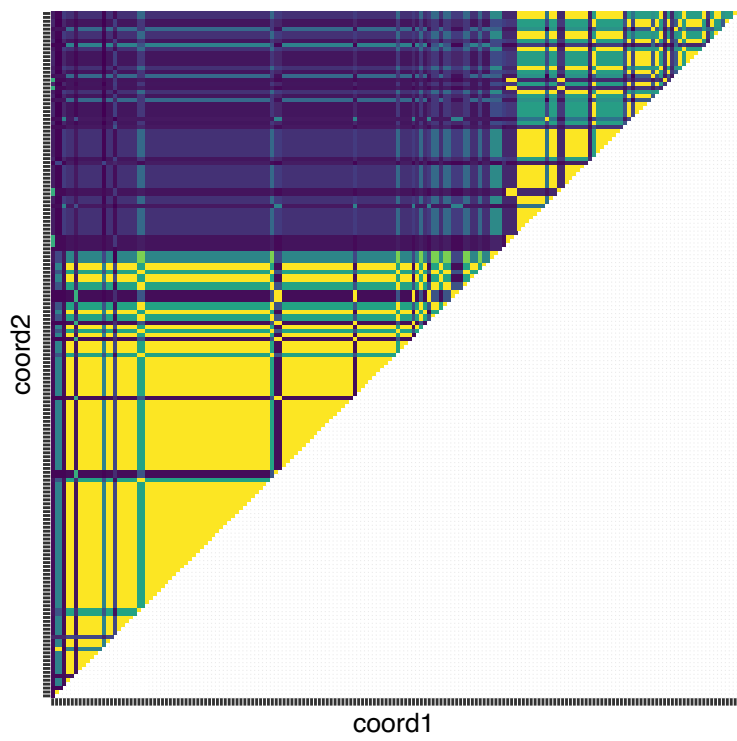

scaffold8:1921168-1924186

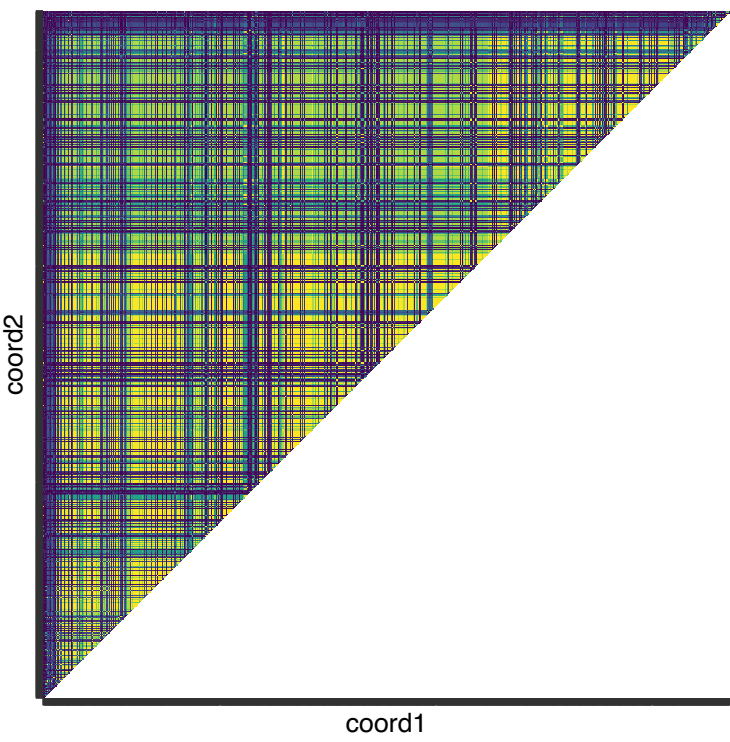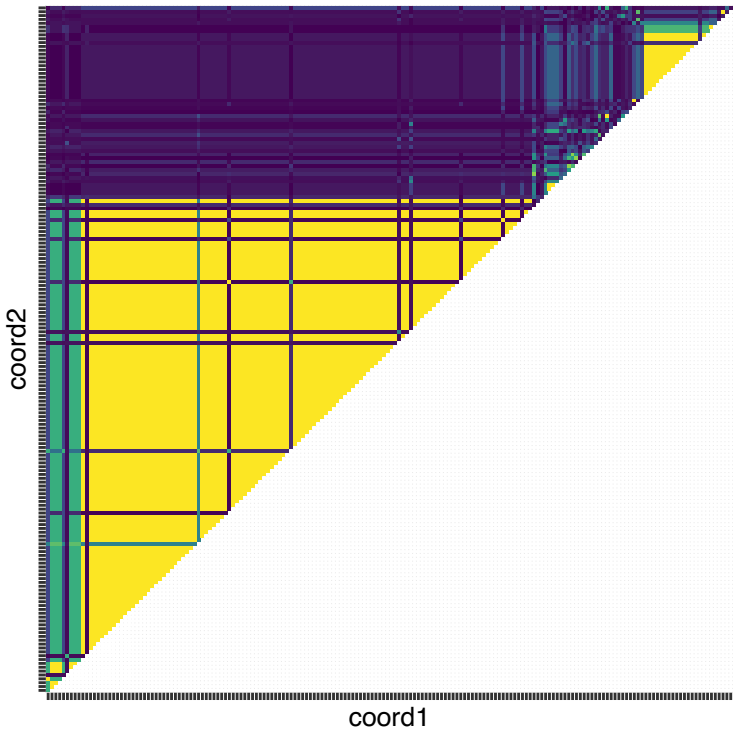

Supplement: supp [file elife-76073-supp-v1.zip]

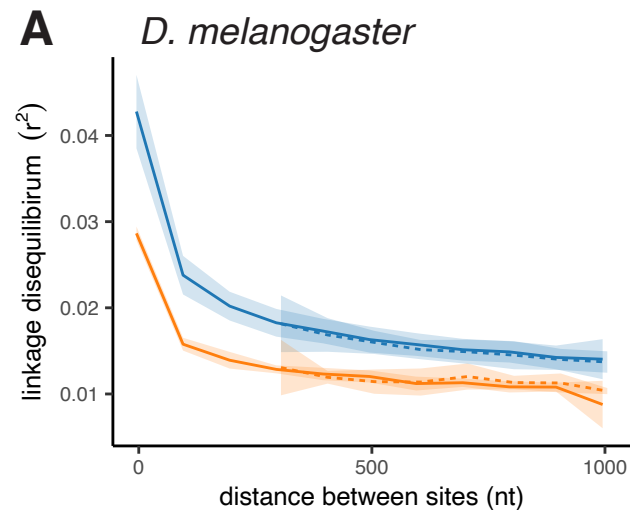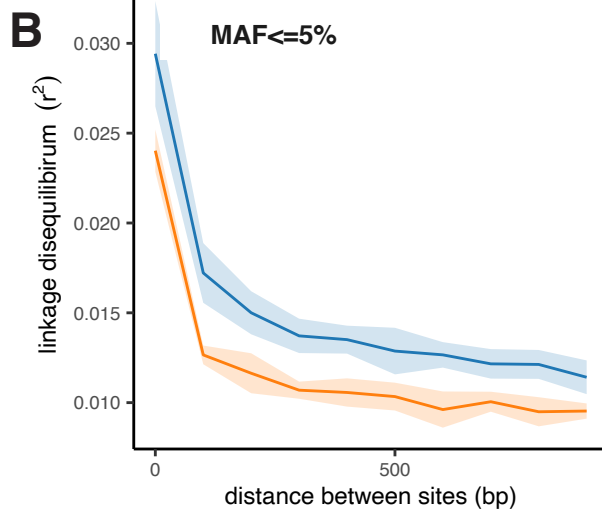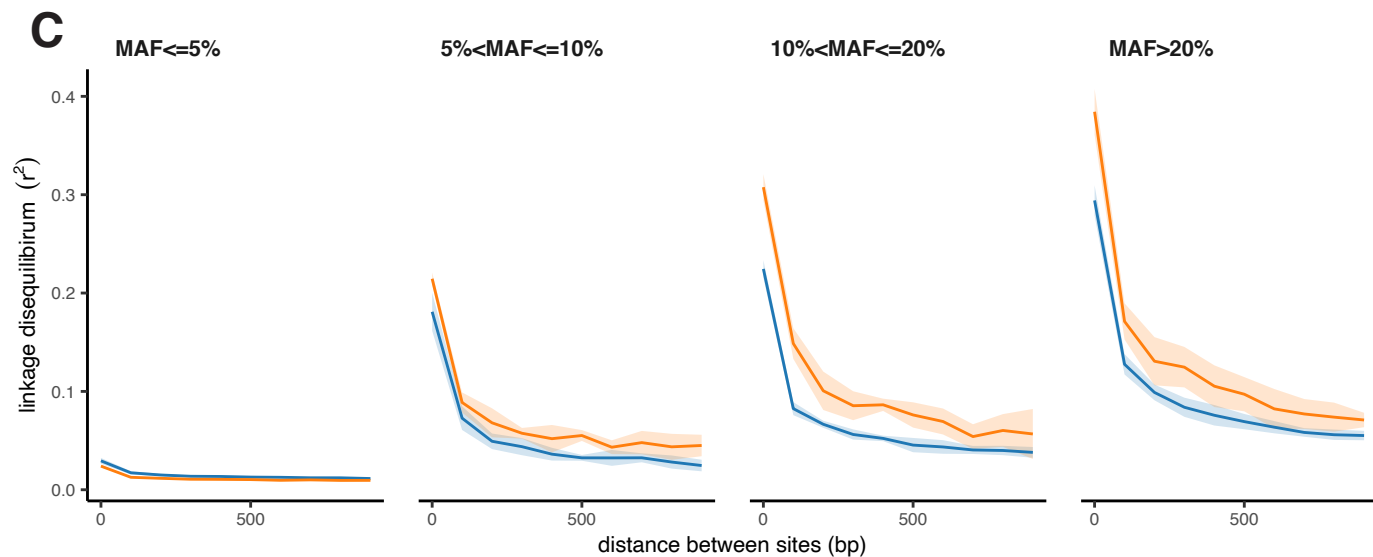

Supplement: supp [file elife-76073-supp-v1.zip › elife_poa_e76073_Figure_1_figure_supplement_5.pdf]

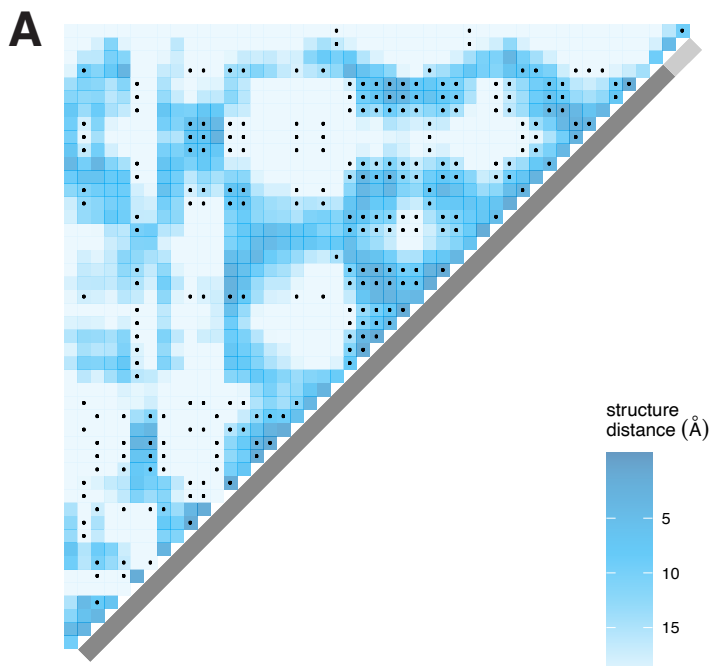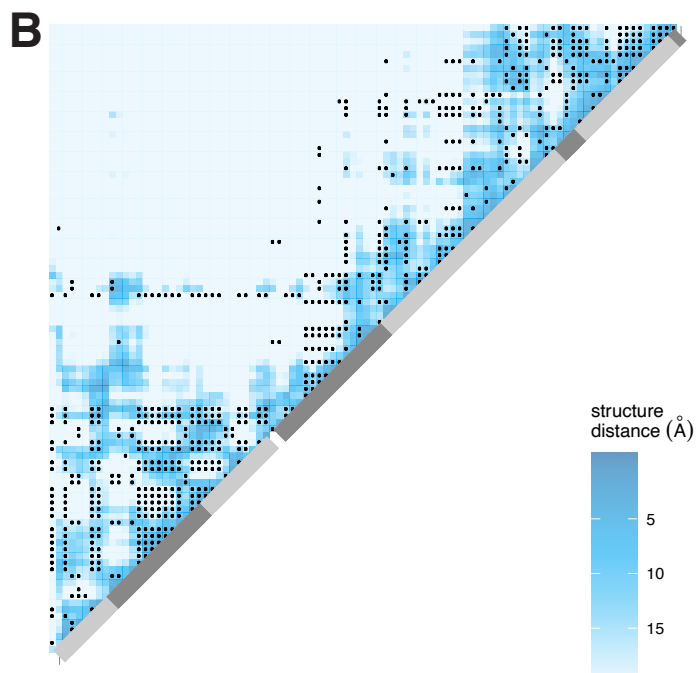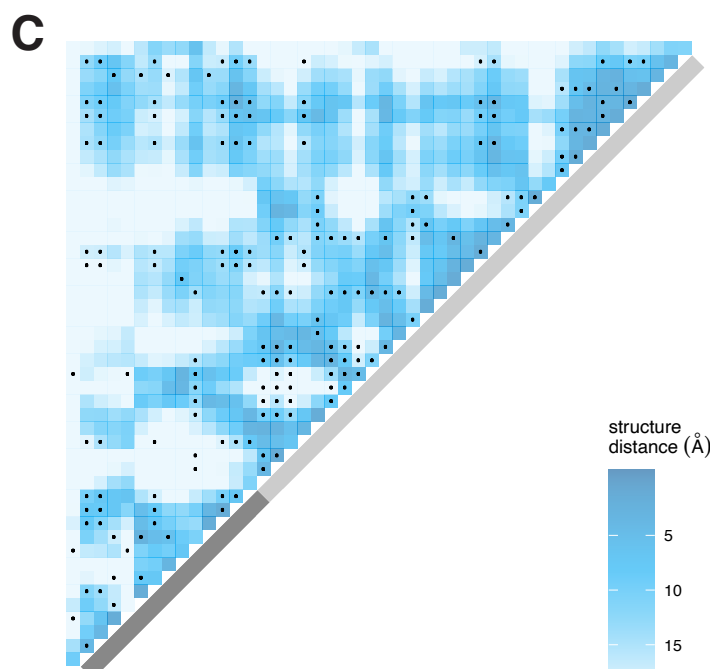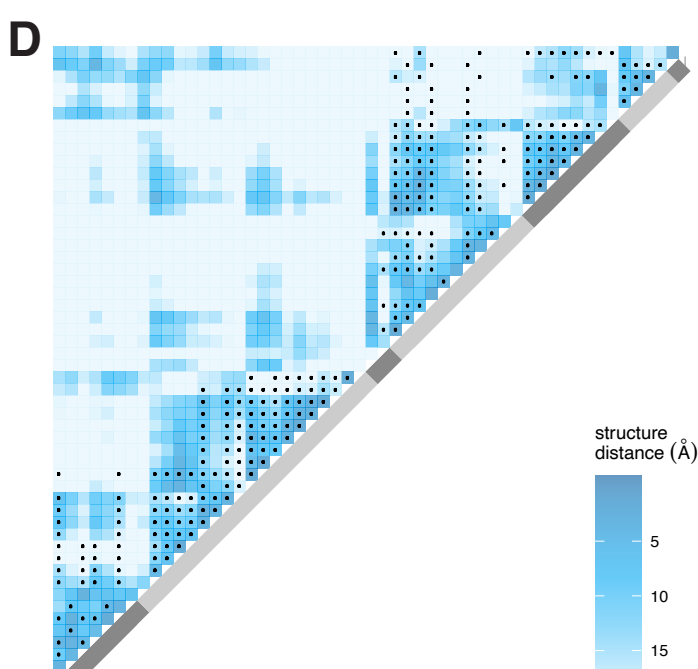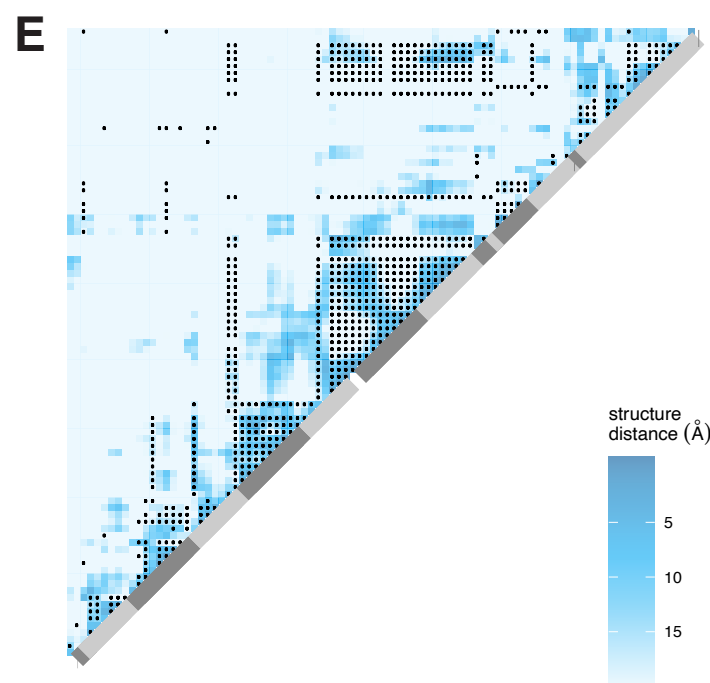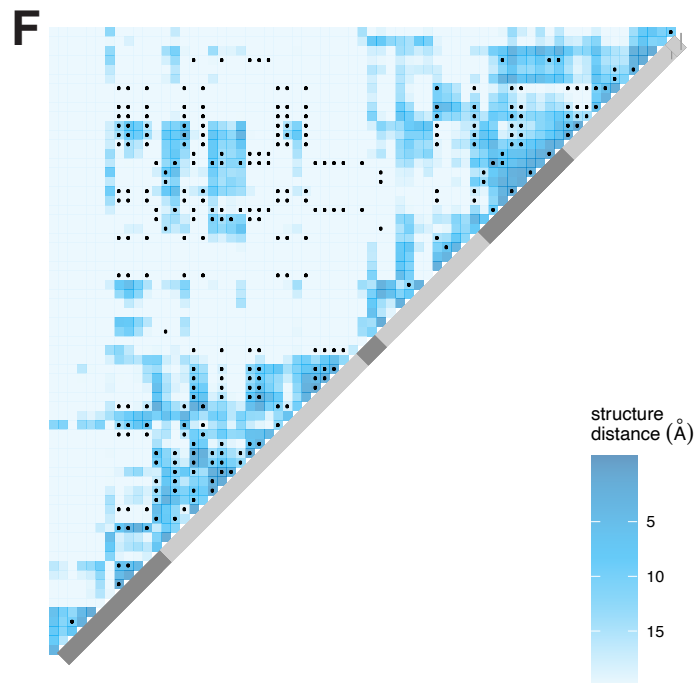

Supplement: supp [file elife-76073-supp-v1.zip › elife_poa_e76073_Figure_2_figure_supplement_1.pdf]

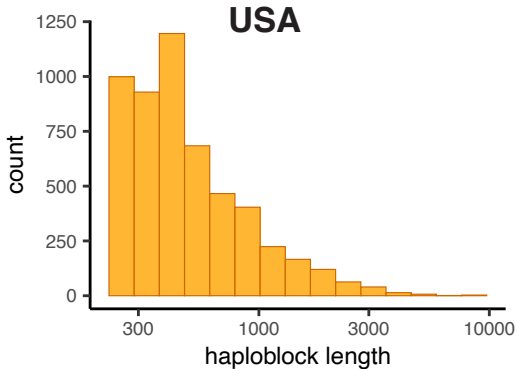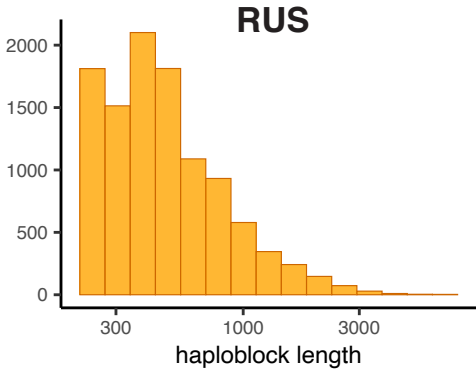

Supplement: supp [file elife-76073-supp-v1.zip › elife_poa_e76073_Figure_3_figure_supplement_2.pdf]

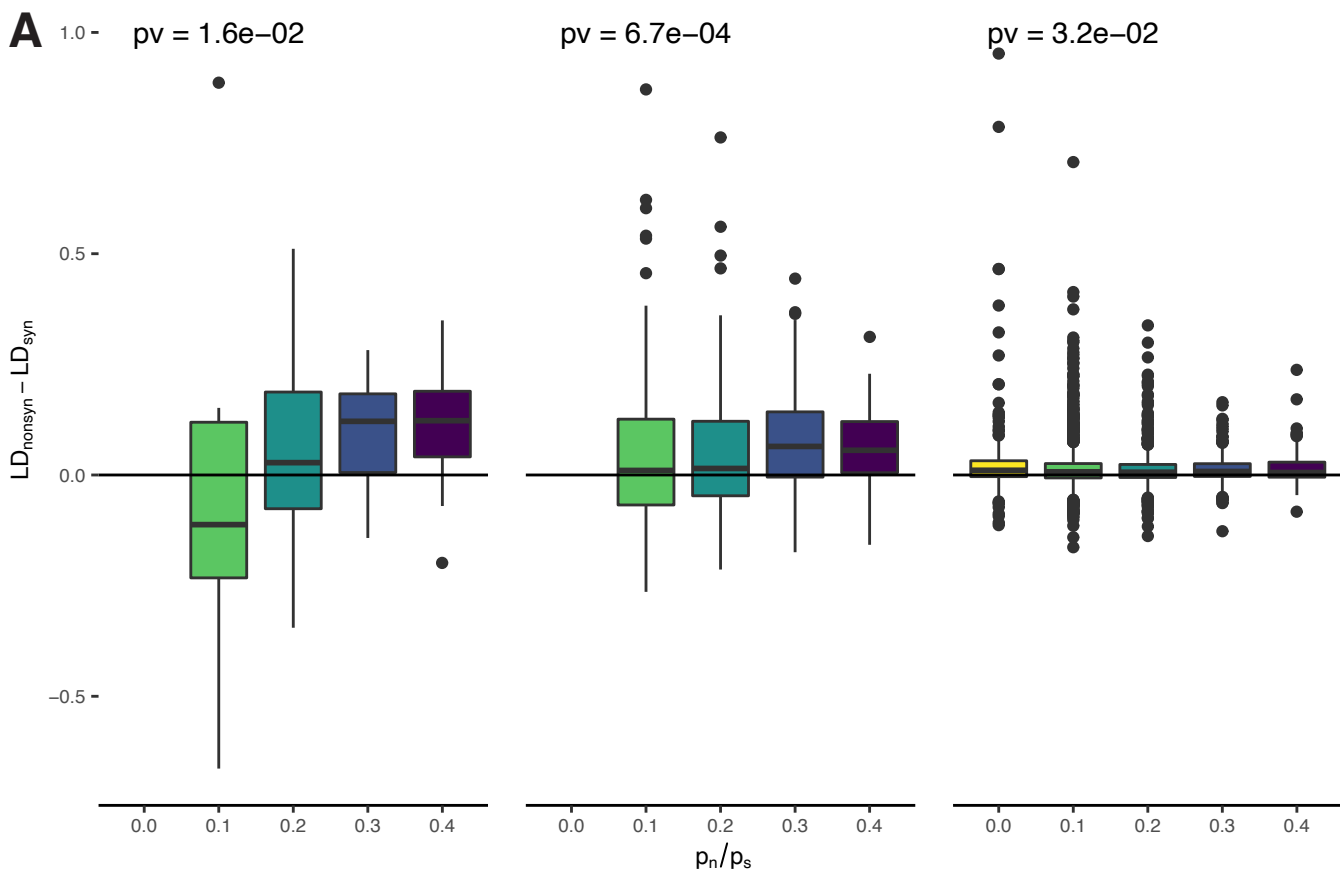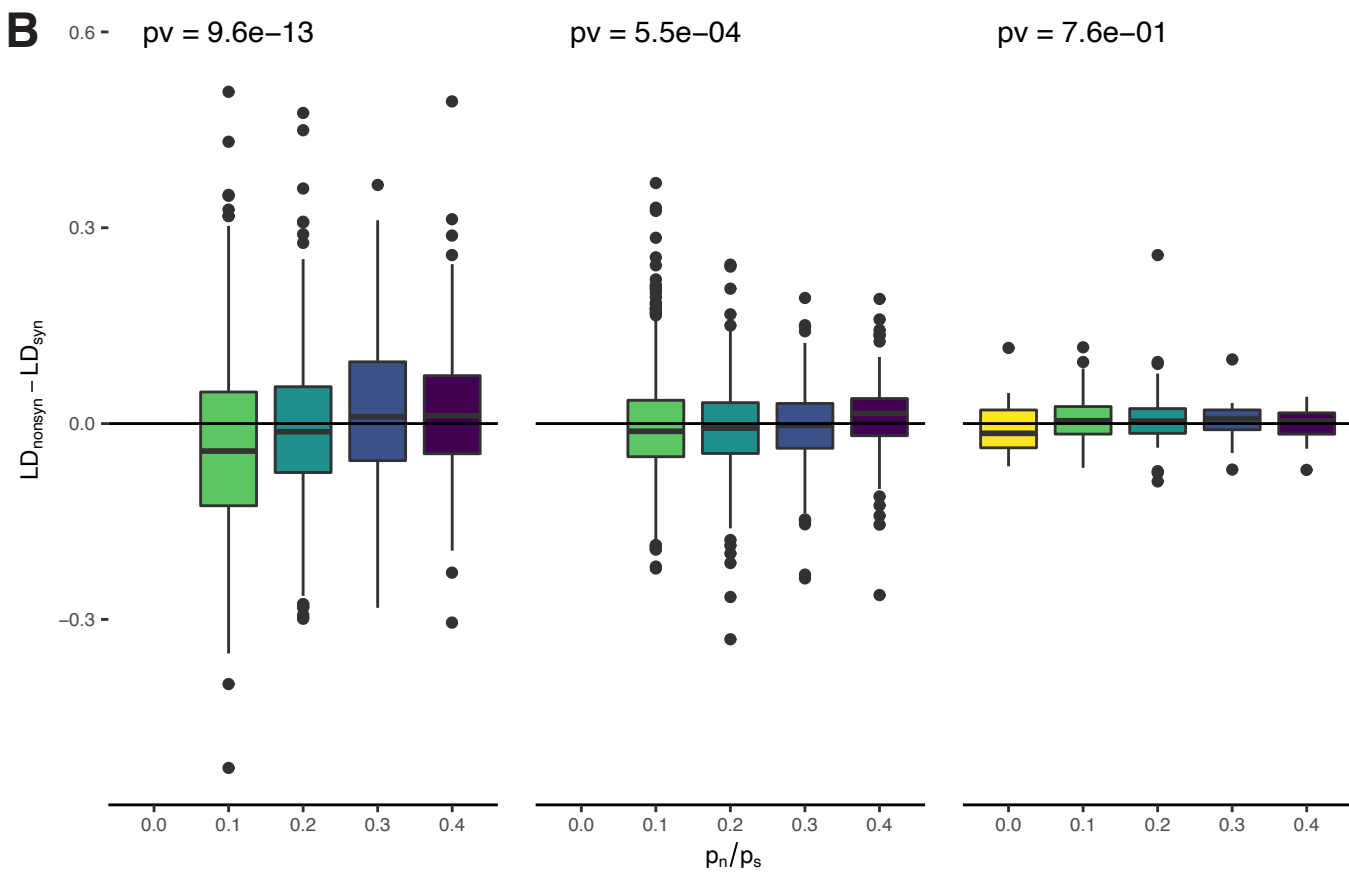

Supplement: supp [file elife-76073-supp-v1.zip › elife_poa_e76073_Figure_3_figure_supplement_5.pdf]

A

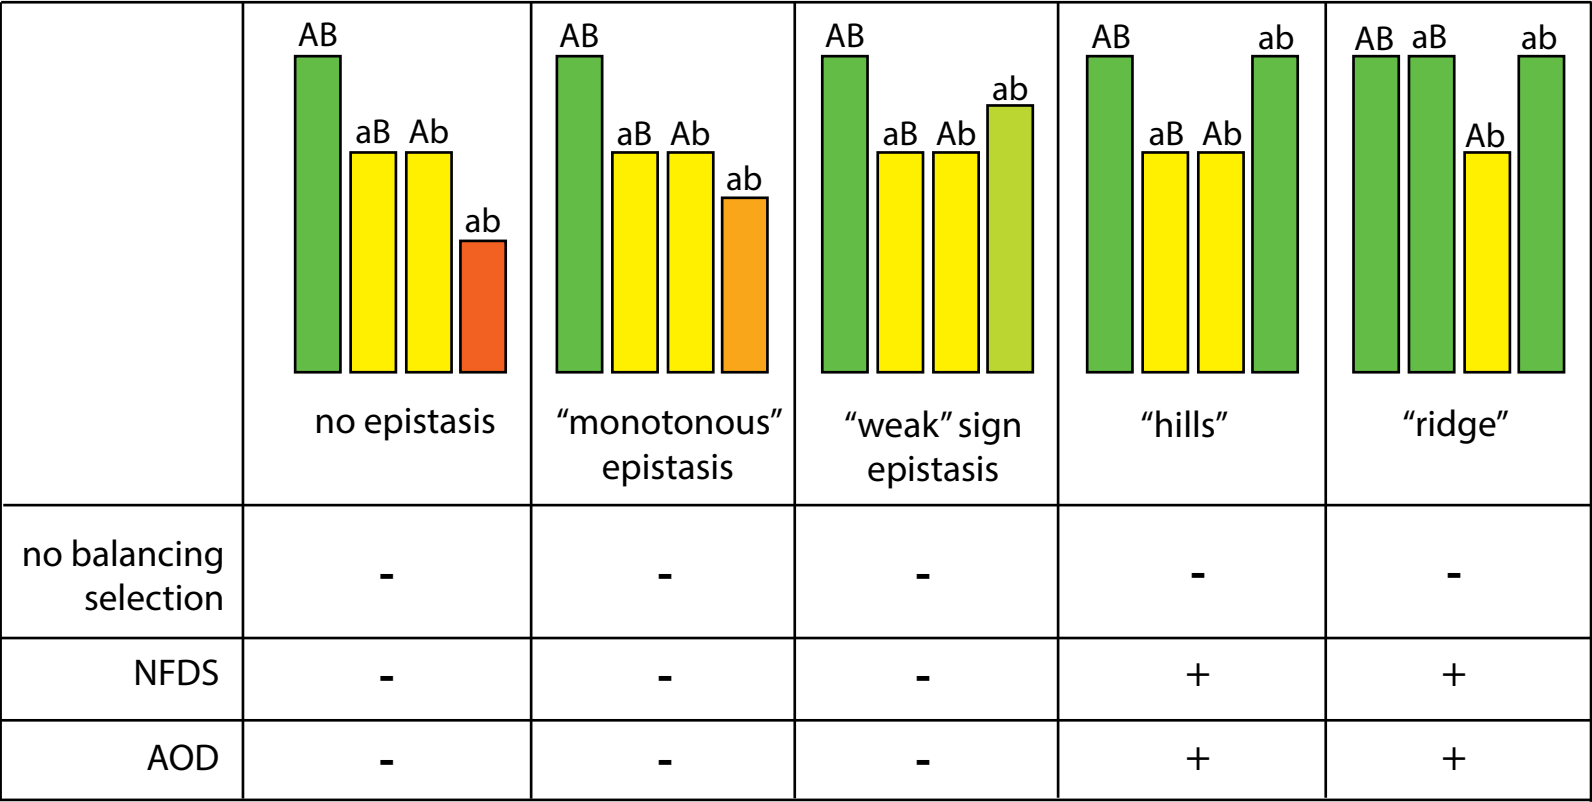

B

no balancing selection   NFDS   AOD

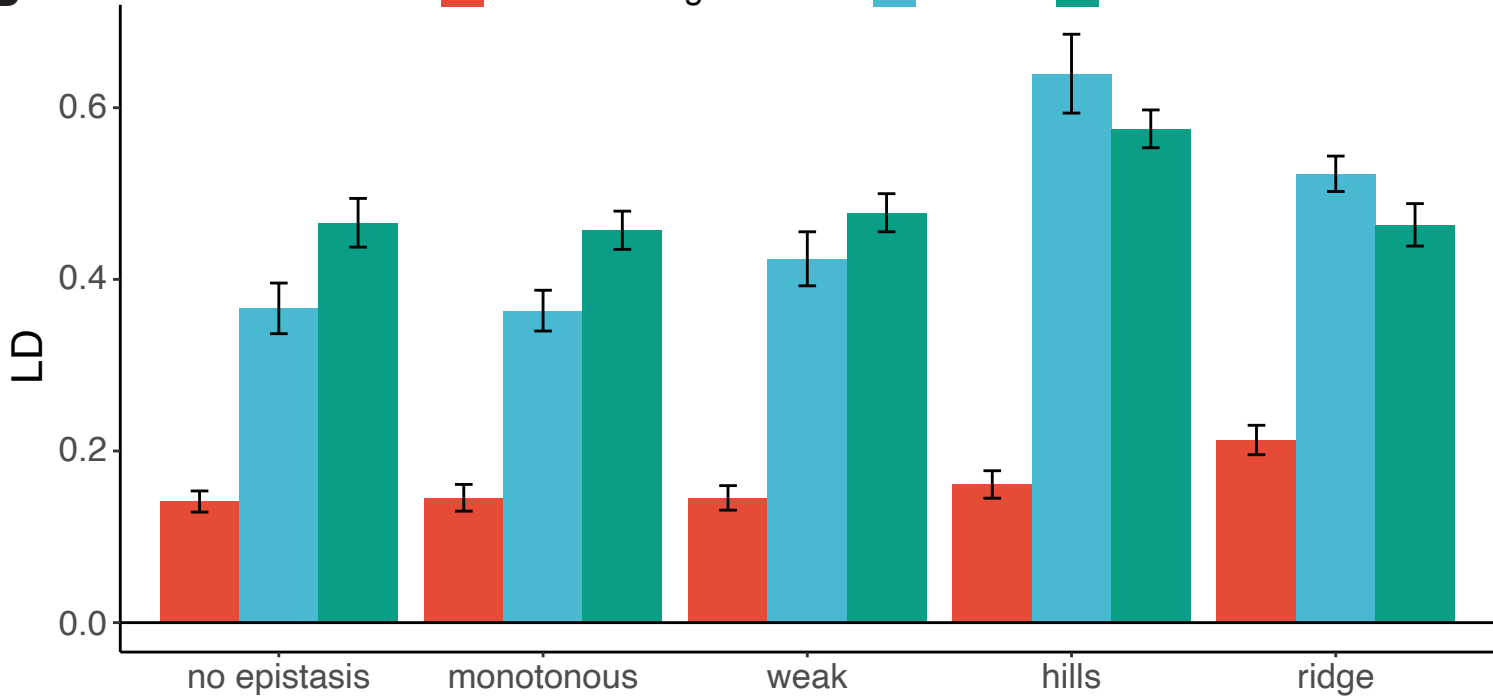

C

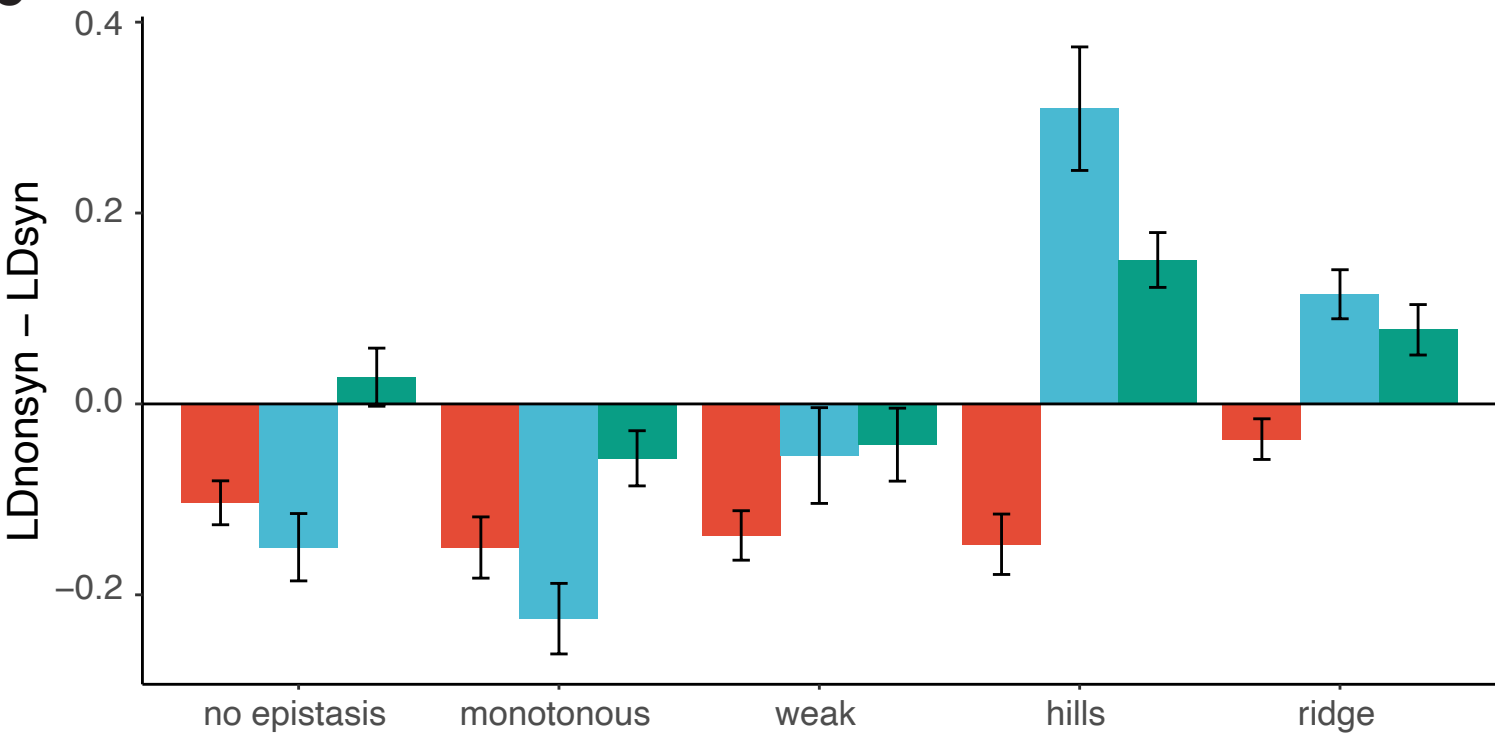

Supplement: supp [file elife-76073-supp-v1.zip › elife_poa_e76073_Figure_3_figure_supplement_6.pdf]

**A****within gene****between genes**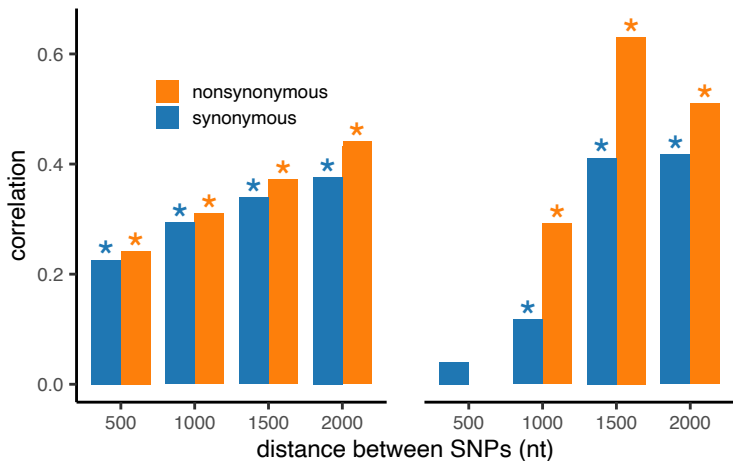**B****within gene****between genes**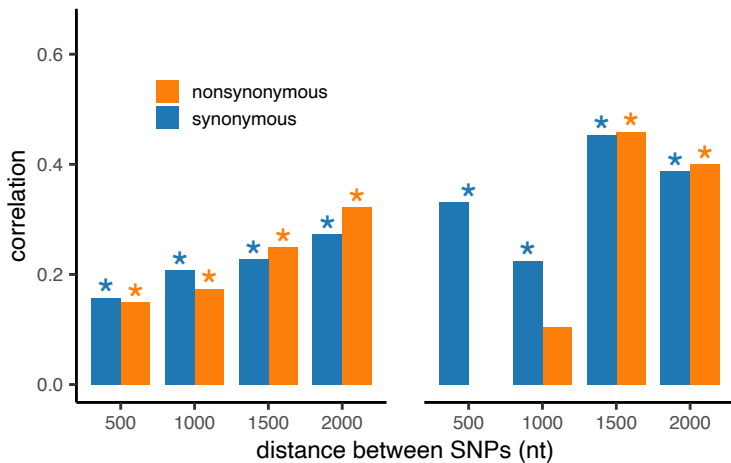

Supplement: supp [file elife-76073-supp-v1.zip › elife_poa_e76073_Figure_4_figure_supplement_2.pdf]
